# Supplementary material
Source: PubMed Central journal article supplement (PMC2909285)
Supplement: supp_fj.09-148973_09-148973SuppTableS1.pdf [file supp_fj.09-148973_09-148973SuppTableS1.pdf]

Supplementary Table 1. Primers and probes for reprogrammed cells

| Primer Name    | Sequence (5' to 3')            | Purpose                                                                        |
|----------------|--------------------------------|--------------------------------------------------------------------------------|
| Nanog-ES       | CAGGTGTTTGAGGGTAGCTC           | RT-PCR for endogenous mouse <i>Nanog</i>                                       |
| Nanog-EAS      | CGGTTTCATCATGGTACAGTC          |                                                                                |
| Oct4-ES        | TCTTTCCACCAGGCCCCCGGCTC        | RT-PCR for endogenous mouse <i>Oct3/4</i>                                      |
| Oct4-EAS       | TGCGGGCGGACATGGGGAGATCC        |                                                                                |
| Sox2-ES        | TAGAGCTAGACTCCGGGCGATGA        | RT-PCR for endogenous mouse <i>Sox2</i>                                        |
| Sox2-EAS       | TTGCCTTAAACAAGACCACGAAA        |                                                                                |
| Rex1-S         | ACGAGTGGCAGTTTCTTCTGGGA        | RT-PCR for mouse <i>Rex1</i>                                                   |
| Rex1-AS        | TATGACTCACTTCCAGGGGGCACT       |                                                                                |
| Eras-S         | ACTGCCCCATCAGACTGCTACT         | RT-PCR for mouse <i>ERas</i>                                                   |
| Eras-AS        | CACTGCCCTGTACTCGGGTAGCTG       |                                                                                |
| Criptio-S      | ATGGACGCAACTGTGAACATGATGTTGCA  | RT-PCR for mouse <i>Cripto</i>                                                 |
| Cripto-AS      | CTTTGAGGTCTGGTCCATCACGTGACCAT  |                                                                                |
| Gdf3-S         | GTTCCAACCTGTGCCTCGCTCTT        | RT-PCR for mouse <i>Gdf3</i>                                                   |
| Gdf3-AS        | AGCGAGGCATGGAGAGAGCGGAGCAG     |                                                                                |
| Dax1-S         | TGCTGCGGTCCAGGCCATCAAGAG       | RT-PCR for mouse <i>Dax1</i>                                                   |
| Dax1-AS        | GGGCACTGTTTCAGTTCAGCGGATC      |                                                                                |
| Utf1-S         | GGATGTCCCAGGTACTACGTCTG        | RT-PCR for mouse <i>Utf1</i>                                                   |
| Utf1-AS        | GGCGGATCTGGTTATCGAAGGGT        |                                                                                |
| FGF4-S         | CGTGGTGAGCATCTTCGGAGTGG        | RT-PCR for mouse <i>FGF4</i>                                                   |
| FGF4-AS        | CCTTCTTGGTCCGCCCTTCTTA         |                                                                                |
| FbxF           | TGCCAATGTTGGGAGTACA            | RT-PCR for mouse <i>Fbx-15</i>                                                 |
| FbxR           | AGATTTCCGATGGCATTCTG           |                                                                                |
| cMyc-ES        | TGACCTAACTCGAGGAGGAGCTGGAATC   | RT-PCR for endogenous mouse <i>c-Myc</i>                                       |
| cMyc-EAS       | AAGTTTGAGGCAGTTAAATATGGCTGAAGC |                                                                                |
| Klf4-ES        | GCGAACTCACACAGGCGAGAAACC       | RT-PCR for endogenous mouse <i>Klf4</i>                                        |
| Klf4-EAS       | TCGCTTCCTCTCCTCCGACACA         |                                                                                |
| Nat1-U         | ATTCTTCGTTGTCAAGCCGCCAAAGTGGAG | RT-PCR for mouse <i>Nat1</i>                                                   |
| Nat1-L         | AGTTGTTTGCTGCGGAGTTGTCATCTCGTC |                                                                                |
| pMXs-TgUS      | GTGGTGGTACGGGAAATCAC           | primer for specific amplification of pMXs derived transgenic transcript        |
| pMXs-Sox2-TgDS | GGTCTCCTGGCCATCTTA             | primer for specific amplification of pMXs derived Sox2 transgenic transcript   |
| pMXs-Oct4-TgDS | TAGCCAGGTTTCGAGAATCCA          | primer for specific amplification of pMXs derived Oct3/4 transgenic transcript |
| pMXs-cMyc-TgDS | AGCAGCTCGAATTTCTTCCA           | primer for specific amplification of pMXs derived c-Myc transgenic transcript  |
| pMXs-Klf4-TgDS | GGGAAGTCGCTTCATGTGAG           | primer for specific amplification of pMXs derived Klf4 transgenic transcript   |
| mCOL1 forward  | GAAACCCGAGGTATGCTTGA           | RT-PCR for mouse <i>TypeI Collagen</i>                                         |
| mCOL1 reverse  | GAGACCACGAGGACCAGAAG           |                                                                                |
| mRunx2 forward | GGACGAGGCAAGAGTTTCAC           | RT-PCR for mouse <i>Runx2</i>                                                  |
| mRunx2 reverse | TGGCTCAGATAGGAGGGGTA           |                                                                                |

|                       |                                                 |                                                                                |
|-----------------------|-------------------------------------------------|--------------------------------------------------------------------------------|
| mCRR9 forward         | GTCGTCAGGTTGCGAGTG                              | RT-PCR for mouse <i>CRR9</i>                                                   |
| mCRR9 reverse         | AAAACCTGGTAGCCCGAAACG                           |                                                                                |
| Taqman mTERT probe    | TTCAGGCCCTACAGGTTCCATGCATGT                     | <i>mTERT</i> qRT-PCR                                                           |
| Taqman mTERT forward  | TTCTAGACTTGACAGGTGAACAGCC                       |                                                                                |
| Taqman mTERT reverse  | TTCCTAACACGCTGGTCAAAGGGA                        |                                                                                |
| Taqman hRluc probe    | CGACCAACTTCTGCAGCTTAAGTTCCG                     | <i>Rluc</i> qRT-PCR                                                            |
| Taqman hRluc forward  | GCTTGATTCTTCTGACACAACAG                         |                                                                                |
| Taqman hRluc reverse  | AGTGGACACCCAGTGCCCT                             |                                                                                |
| Taqman 18sRNA probe   | AGCAATAACAGGTCTGTGATG                           | <i>18s</i> qRT-PCR                                                             |
| Taqman 18sRNA forward | TAGAGGGACAAGTGGCGTTC                            |                                                                                |
| Taqman 18sRNA reverse | CGCTGAGCCAGTCAGTGT                              |                                                                                |
| Taqman hTERT probe    | TGGATTTGCAGGTGAACAGCCTCCA                       | <i>hTERT</i> qRT-PCR                                                           |
| hTERT forward         | GAACATGCGTCGCAAACCTTTGG                         |                                                                                |
| hTERT reverse         | TGCAGCAGGAGGATCTTGATAGTG                        |                                                                                |
| MeNanog-S             | GATTTTGTAGGTGGGATTAATTGTGAATTT                  | methylation analysis of mouse <i>Nanog</i> promoter                            |
| MeNanog-AS            | ACCAAAAAACCCACACTCATATCAATATA                   |                                                                                |
| mTERT methF1          | TTGTAGAGGGAAATTTTGTATGAGTG                      | methylation analysis of <i>mTERT</i> promoter                                  |
| mTERT methR1          | ATACTTAAAAACAACCAAAACCCA                        |                                                                                |
| hTERT methF2          | GTTTTTAGGGTTTTATATATATGTT                       | methylation analysis of transgenic <i>hTERT</i> promoter                       |
| hTERT methR2          | ACCAACTTCTACAACCTTAAATT                         |                                                                                |
| mNPYF3                | GGGACACCGCTGATCGTTTATTTAAATTGGGTATGGTGGTAGATAAG | mouse <i>Nanog</i> promoter Pyrosequencing first PCR                           |
| mNPYR3                | TTCTCTTCCATTCTTTCTACAACATAAAACCTTACTACAAAATCTC  |                                                                                |
| UNI Biotin            | 5'(Biotin)GGGACACCGCTGATCGTTTA                  | mouse <i>Nanog</i> promoter Pyrosequencing primer for second biotinylation PCR |
| mNPY3                 | AACCTTACTACCAAAATCTC                            | mouse <i>Nanog</i> promoter Pyrosequencing sequencing primer                   |
| OCT4 forward          | GACAGGGGGAGGGGAGGAGCTAGG                        | RT-PCR for endogenous human <i>Oct3/4</i>                                      |
| OCT4 reverse          | CTTCCCTCCAACCAAGTTGCCCAAAC                      |                                                                                |
| SOX2 forward          | GGGAAATGGGAGGGGTGCAAAAGAGG                      | RT-PCR for endogenous human <i>Sox2</i>                                        |
| SOX2 reverse          | TTGCGTGAGTGTGGATGGGATTGGTG                      |                                                                                |
| Nanog forward         | TTTGGAAGCTGCTGGGGAAG                            | RT-PCR for endogenous human <i>Nanog</i>                                       |
| Nanog reverse         | GATGGGAGGAGGGGAGAGGA                            |                                                                                |
| Klf4 forward          | GCCACCCACACTTGTGATT                             | RT-PCR for endogenous human <i>klf4</i>                                        |
| Klf4 reverse          | TCCACTCACAAGATGACTCAGT                          |                                                                                |
| c-Myc forward         | TGCCTCAAATFGGACTTTGG                            | RT-PCR for endogenous human <i>c-Myc</i>                                       |
| c-Myc reverse         | GATTGAAATCTGTGTAACCTGC                          |                                                                                |
| Lin28 forward         | AGTTTTGAGGAGCAGGCAGA                            | RT-PCR for endogenous human <i>lin28</i>                                       |
| Lin28 reverse         | ACTTCCCTATCCAGGCCACT                            |                                                                                |
| CRR9 forward          | GCCATTGAGCTGTGGAAAGT                            | RT-PCR for human <i>CRR9</i>                                                   |
| CRR9 reverse          | TCCCCAAACTCGTTCACCTCT                           |                                                                                |
